# Supplementary material for: A karst-inspired hierarchical Mg/Al layered double hydroxide with a high entropy-driven process for interception and storage
Source: Royal Society of Chemistry journal article supplement (doi:10.1039/d3dt03615d), 2024-01-01
Supplement: d3dt03615d1.pdf [file d3dt03615d1.pdf]

## Supplementary Materials

### **Karst-inspired hierarchical Mg/Al layered double hydroxide with high entropy-driven for interception and storage**

Hongyu Shi<sup>1</sup>, Jun Qin<sup>1, \*</sup>, Qing Lv<sup>1</sup>, Lijin Zhang<sup>1</sup>, Qingxin Li<sup>1</sup>, Bin Ou<sup>1, 2</sup>, Xiaolang Chen<sup>3, \*</sup>

1. Key Laboratory of Karst Georesources and Environment, Ministry of Education, College of Resources and Environment Engineering, Guizhou University, 550025 Guiyang, China;

2. Fuzhou Hongtai Investment Co., Ltd., 350001 Fuzhou, China;

3. Key Laboratory of Advanced Materials Technology Ministry of Education, School of Materials Science and Engineering, Southwest Jiaotong University, 610031 Chengdu, China

\*Corresponding author, E-mail address: [qi\\_njun@163.com](mailto:qi_njun@163.com) (J. Qin);  
[chenxl612@sina.com](mailto:chenxl612@sina.com) (X. Chen.).

## **List of text and tables**

Text S1: Formula details

Table S1 Actual Mg-Al ratio of different LDHs.

Table S2 BET data of adsorbents.

Table S3 Adsorption kinetics fitting parameters.

Table S4 Adsorption isotherms fitting parameters.

Table S5 Adsorption thermodynamic parameters.

Table S6 Comparison of phosphate adsorption properties of Mg-Al LDH modified by different methods.

### Text S1: Formula details

The removal efficiency (%) and phosphate adsorption capacity ( $\text{mg g}^{-1}$ ) of three adsorbents were calculated using the following equations:

$$q_e = (C_0 - C_e)V/m \quad (1)$$

$$q_t = (C_0 - C_t)V/m \quad (2)$$

$$\eta = (C_0 - C_e)V/C_0 \quad (3)$$

where  $C_0$  ( $\text{mg L}^{-1}$ ) represents the phosphate concentration before adsorption;  $C_e$  ( $\text{mg L}^{-1}$ ) and  $C_t$  ( $\text{mg L}^{-1}$ ) represent the phosphate concentration at equilibrium and time  $t$ , respectively;  $V$  (L) represents the solution volume and  $m$  (g) represents the mass of the adsorbent.

#### 1.1. Adsorption kinetics

The adsorption kinetics is significant in further exploring the adsorption mechanism. Pseudo-first-order,<sup>[1]</sup> pseudo-second-order,<sup>[2]</sup> and Elovich<sup>[3,4]</sup> models were applied to fit the adsorption data. The equations are as follows:

$$\text{Pseudo-first-order equation: } q_t = q_e[1 - \exp(-K_1 t)] \quad (4)$$

$$\text{Pseudo-second-order equation: } q_t = q_e^2 K_2 t / (1 + K_2 q_e t) \quad (5)$$

$$\text{Elovich equation: } q_t = a \ln t + b \quad (6)$$

where  $q_t$  ( $\text{mg g}^{-1}$ ) and  $q_e$  ( $\text{mg g}^{-1}$ ) represent the amounts of phosphate adsorbed at time  $t$  and adsorption equilibrium, respectively;  $K_1$  ( $\text{min}^{-1}$ ) and  $K_2$  ( $\text{g mg}^{-1} \text{min}^{-1}$ ) represent the adsorption rate constants;  $a$  and  $b$  represent the rate constants fitted by the Elovich model.

## 1.2. Adsorption isotherms

Adsorption isotherms show the relationship between adsorption capacity ( $q_e$ ) and the adsorption equilibrium concentration ( $C_e$ ) under suitable reaction conditions. Langmuir,<sup>[5]</sup> Freundlich,<sup>[6]</sup> and Toth <sup>[7,8]</sup> models were applied to describe monolayer homogeneous, multilayer heterogeneous, and multilayer heterogeneous surface adsorption processes, respectively. The models can be expressed by the following equations:

$$\text{Langmuir model: } q_e = q_m K_L C_e / (1 + K_L C_e) \quad (7)$$

$$\text{Freundlich model: } q_e = K_F C_e^{1/n} \quad (8)$$

$$\text{Toth model: } q_e = q_m C_e / [aT + C_e^Z]^{1/Z} \quad (9)$$

where  $q_m$  (mg g<sup>-1</sup>) and  $K_L$  represent the maximum adsorption capacity of phosphate and the constant in the Langmuir related to the heat of adsorption, respectively;  $K_F$  and  $n$  represent the adsorption capacity and favorability of adsorption, respectively;  $Z$  represents the heterogeneity of the adsorbent surface, and  $aT$  represents the adsorption affinity.

## 1.3. Adsorption thermodynamics

To evaluate the spontaneity and thermostability of LDHs during adsorption process, three thermodynamic parameters ( $\Delta G^0$ ,  $\Delta S^0$ , and  $\Delta H^0$ ) were calculated.<sup>[9]</sup> The equations are as follows:

$$\Delta G^0 = -RT \ln K \quad (10)$$

$$\Delta G^0 = \Delta H^0 - T \Delta S^0 \quad (11)$$

$$\ln K = -\Delta H^0 / RT + \Delta S^0 / R \quad (12)$$

where  $K$  ( $\text{L mol}^{-1}$ ) and  $R$  ( $8.314 \text{ J K}^{-1} \text{ mol}^{-1}$ ) are the thermodynamic equilibrium constant and the gas constant, respectively.

Table S1 Actual Mg-Al ratio of different LDHs.

| Samples   | Ratio                                                      | Mg element | Al element | [Mg]/[Al] |
|-----------|------------------------------------------------------------|------------|------------|-----------|
|           |                                                            | content(%) | content(%) | (ICP-OES) |
| G-LDH     | Mg <sup>2+</sup> :Al <sup>3+</sup> :Na <sup>+</sup> =4:1:1 | 26.04      | 6.40       | 4.51      |
| Rock-LDH  | Mg <sup>2+</sup> :Al <sup>3+</sup> :Na <sup>+</sup> =4:1:1 | 24.08      | 6.35       | 4.20      |
| Karst-LDH |                                                            | 14.30      | 13.22      | 1.20      |

Table S2 BET data of adsorbents.

| Samples   | Specific Surface Area<br>(m <sup>2</sup> g <sup>-1</sup> ) | Pore Volume<br>(m <sup>3</sup> g <sup>-1</sup> ) | Average Pore<br>Diameter<br>(nm) |
|-----------|------------------------------------------------------------|--------------------------------------------------|----------------------------------|
| G-LDH     | 16.239                                                     | 0.107                                            | 25.677                           |
| Rock-LDH  | 36.828                                                     | 0.221                                            | 23.279                           |
| Karst-LDH | 48.470                                                     | 0.227                                            | 18.145                           |

Table S3 Adsorption kinetics fitting parameters.

| Samples   | Pseudo-first-order             |                               |                | Pseudo-second-order            |                                                  |                | Elovich |        |                |
|-----------|--------------------------------|-------------------------------|----------------|--------------------------------|--------------------------------------------------|----------------|---------|--------|----------------|
|           | $q_e$<br>(mg g <sup>-1</sup> ) | $K_1$<br>(min <sup>-1</sup> ) | R <sup>2</sup> | $q_e$<br>(mg g <sup>-1</sup> ) | $K_2$<br>(g mg <sup>-1</sup> min <sup>-1</sup> ) | R <sup>2</sup> | $a$     | $b$    | R <sup>2</sup> |
| G-LDH     | 6.345                          | 0.927                         | 0.320          | 6.599                          | 0.193                                            | 0.681          | 0.501   | 4.368  | 0.986          |
| Rock-LDH  | 14.201                         | 0.660                         | 0.602          | 14.664                         | 0.077                                            | 0.899          | 1.059   | 9.800  | 0.919          |
| Karst-LDH | 60.457                         | 0.310                         | 0.947          | 62.790                         | 0.008                                            | 0.982          | 6.384   | 32.081 | 0.810          |

Table S4 Adsorption isotherms fitting parameters.

| Samples   | T<br>(K) | Langmuir isotherm<br>equation  |       |                | Freundlich<br>equation |       |                | Toth equation                  |                        |       |                |
|-----------|----------|--------------------------------|-------|----------------|------------------------|-------|----------------|--------------------------------|------------------------|-------|----------------|
|           |          | $q_m$<br>(mg g <sup>-1</sup> ) | $K_L$ | R <sup>2</sup> | $K_F$                  | $1/n$ | R <sup>2</sup> | $q_m$<br>(mg g <sup>-1</sup> ) | $a_T$                  | $Z$   | R <sup>2</sup> |
| G-LDH     | 298      | 16.14                          | 0.012 | 0.956          | 1.342                  | 0.400 | 0.982          | 39.25                          | 0.025                  | 0.357 | 0.978          |
|           | 308      | 22.50                          | 0.010 | 0.979          | 1.420                  | 0.442 | 0.993          | 53.93                          | 0.015                  | 0.392 | 0.992          |
|           | 318      | 24.81                          | 0.013 | 0.968          | 2.275                  | 0.388 | 0.982          | 61.15                          | 0.031                  | 0.347 | 0.983          |
| Rock-LDH  | 298      | 38.36                          | 0.013 | 0.893          | 2.954                  | 0.422 | 0.976          | 123.76                         | 0.039                  | 0.291 | 0.962          |
|           | 308      | 44.60                          | 0.012 | 0.946          | 3.412                  | 0.419 | 0.992          | 142.46                         | 0.027                  | 0.309 | 0.985          |
|           | 318      | 49.96                          | 0.012 | 0.979          | 4.146                  | 0.400 | 0.996          | 153.78                         | 0.026                  | 0.314 | 0.996          |
| Karst-LDH | 298      | 105.54                         | 0.860 | 0.750          | 61.402                 | 0.119 | 0.990          | 435.00                         | 2.610*10 <sup>9</sup>  | 0.081 | 0.959          |
|           | 308      | 111.41                         | 0.900 | 0.795          | 63.554                 | 0.125 | 0.992          | 593.40                         | 3.066*10 <sup>9</sup>  | 0.076 | 0.997          |
|           | 318      | 114.30                         | 1.980 | 0.711          | 67.794                 | 0.119 | 0.998          | 1230.31                        | 4.411*10 <sup>16</sup> | 0.049 | 0.998          |

Table S5 Adsorption thermodynamic parameters.

| Samples   | T (K) | $\Delta G^0$ (KJ mol <sup>-1</sup> ) | $\Delta H^0$ (KJ mol <sup>-1</sup> ) | $\Delta S^0$ (J K <sup>-1</sup> mol <sup>-1</sup> ) | % $\zeta_H$ | % $\zeta_S$ |               |
|-----------|-------|--------------------------------------|--------------------------------------|-----------------------------------------------------|-------------|-------------|---------------|
| G-LDH     | 298   | -0.728                               |                                      |                                                     | 49.321      | 50.679      | Table S6      |
|           | 308   | -0.899                               | 20.313                               | 70.040                                              | 48.496      | 51.504      |               |
|           | 318   | -2.152                               |                                      |                                                     | 47.699      | 52.301      |               |
| Rock-LDH  | 298   | -2.683                               |                                      |                                                     | 45.466      | 54.250      | Comparison of |
|           | 308   | -3.142                               | 13.330                               | 53.655                                              | 44.649      | 55.351      |               |
|           | 318   | -3.760                               |                                      |                                                     | 43.861      | 56.139      |               |
| Karst-LDH | 298   | -10.201                              |                                      |                                                     | 21.640      | 78.360      | n of          |
|           | 308   | -10.631                              | 3.887                                | 47.231                                              | 21.086      | 78.914      |               |
|           | 318   | -11.148                              |                                      |                                                     | 20.560      | 79.441      |               |

phosphate adsorption properties of Mg-Al LDH modified by different methods.

| Adsorbents                                     | Adsorbent characteristics and adsorption conditions                                                                                                                                  | Actual maximum adsorption capacity (mg g <sup>-1</sup> ) | Ref       |
|------------------------------------------------|--------------------------------------------------------------------------------------------------------------------------------------------------------------------------------------|----------------------------------------------------------|-----------|
| Mg/Al hydroxides modified almond shell biochar | Mg/Al ratio=3<br>SSA: 4.51 m <sup>2</sup> g <sup>-1</sup> PV: 0.023 cm <sup>3</sup> g <sup>-1</sup><br>Dosage: 2.50 g L <sup>-1</sup> C <sub>0</sub> : 0-250 mg L <sup>-1</sup>      | 6.10                                                     | [10]      |
| Mg-Al-LDH/BC                                   | SSA: 77.32 m <sup>2</sup> g <sup>-1</sup> PD: 16.377 nm<br>C <sub>0</sub> : 5-80 mg P L <sup>-1</sup> T: 298K                                                                        | 36.19 (P)                                                | [11]      |
| Mg-Al-La LDH/Fe <sub>3</sub> O <sub>4</sub> /C | SA: 19.19 m <sup>2</sup> g <sup>-1</sup> PV: 0.096 cm <sup>3</sup> g <sup>-1</sup><br>PD: 20.637 nm<br>Dosage: 0.6 g L <sup>-1</sup> pH: 7 T: 328 K<br>Co: 10-100 mg L <sup>-1</sup> | 106.21                                                   | [12]      |
| Mg/Al-201                                      | SA: 4.32 m <sup>2</sup> g <sup>-1</sup> PD: 8.4 nm<br>Dosage: 0.5 g L <sup>-1</sup> T: 298 K                                                                                         | 52.00                                                    | [13]      |
| Mg-Al-CO <sub>3</sub> LDH-Chitosancomposite    | Dosage: 0.3 g L <sup>-1</sup> pH: 5<br>Co: 10-120 mg L <sup>-1</sup>                                                                                                                 | 54.9                                                     | [14]      |
| 40% LDH/biochar composite                      | SA: 10.1 m <sup>2</sup> g <sup>-1</sup><br>Dosage: 2.0 g L <sup>-1</sup> Co: 50 mg P L <sup>-1</sup>                                                                                 | 13.23 (P)                                                | [15]      |
| Karst-LDH                                      | SA: 48.47 m <sup>2</sup> g <sup>-1</sup> PV: 0.227 cm <sup>3</sup> g <sup>-1</sup><br>PD: 18.145 nm<br>Dosage: 0.8 g L <sup>-1</sup> Co: 25-300 mg L <sup>-1</sup>                   | 127.17                                                   | This work |

Note: SSA, PV, PD represent specific surface area, pore volume, pore diameter, respectively.

## References

[1] S. Lagergren, *K. Sven. Vetensk. Handl.*, 1898, **241**, 1-39.



- [2] Y.S. Ho and G. McKay, *Process. Biochem.* 1999, **34**, 451-465.
- [3] P.N. Diagboya, B.I. Olu-Owolabi and K.O. Adebawale, *RSC Adv.*, 2015, **5**, 2536-2542.
- [4] M.J.D. Low, *Chem. Rev.*, 1960, **60**, 267.
- [5] I. Langmuir, *J. Am. Chem. Soc.*, 1918, **40**, 489.
- [6] H. Freundlich and W. Heller, *J. Am. Chem. Soc.*, 1939, **61**, 2228.
- [7] J.Toth, *Adv. Colloid Interf. Sci.*, 1995, **55**, 1.
- [8] J.Toth, *Marcel Dekker*, 2002.
- [9] S. Merrad, M. Abbas and M. Trari, *Fiber. Polym.*, 2023, **24**, 1067.
- [10] S. Li, X. Ma, Z. Ma, X. Dong, Z. Wei, X. Liu and L. Zhu, *Environ. Technol. Innov.*, 2021, **23**, 101771.
- [11] J. Zhang, W. Huang, D. Yang, J. Xiang and Y. Chen, *Sci. Total Eenviron.*, 2022, **844**, 156802.
- [12] Y. Wang, J. Li, Y. Yuan, Y. Si, J. Xu, M. Li and X. Peng, *Colloid. Surface. A.*, 2021, **626**, 127060.
- [13] G. Nie, L. Wu, S. Qiu, Z. Xu and H. Wang, *J. Colloid. Interf. Sci.*, 2022, **614**, 583-592.
- [14] N. Isidoro Ribeiro, O. Barreto Pessanha, M. Luiza Gomes Soares Pessanha and D. Guimarães, *Sep. Purif. Technol.*, 2023, **307**, 122717.
- [15] S. Wan, S. Wang, Y. Li and B. Gao, *J. Ind. Eng. Chem.*, 2017, **47**, 246-253.
